# Supplementary material for: Unraveling genetic variation among white spruce families generated through different breeding strategies: Heritability, growth, physiology, hormones and gene expression
Source: Frontiers journal article supplement (doi:10.3389/fpls.2023.1052425), 2023-04-03
Supplement: Table_1.xls [file Table_1.xls]

## Sheet: Metadata Template
SERIES
title	Real-time quantitative PCR analysis of white spruce (Picea glauca) families with different growth rates
summary	Tree improvement programs select genotypes for faster growth, at both early and late stages, to increase yields over unimproved material, and the improvement is frequently attributed to genetic control in growth parameters among genotypes. Underutilized genetic variability among genotypes also has the potential to ensure future gains are possible. However, the genetic variation in growth, physiol…
overall design	The experiment was a randomized complete block design with a total of 23 families, from three different breeding strategies (CC,PM, OP), each families with three repetitions (total samples=69). CC= controlled crosses, PM= polymix pollination, OP=open pollination. OP is the control. For the qPCR gene expression profiling, an equal amount of total RNA from each sample was pooled e gene expression a…
contributor	Galeano, Esteban
contributor	Thomas, Barb R.
SAMPLES
Sample name	title	description	source name	organism	characteristics: tissue	molecule	label	platform
SAMPLE 1	927_PM_Repetition_1	Test	Plants without treatment	White spruce	Needles	total RNA	SYBR Green
SAMPLE 2	927_OP_Repetition_1	Control	Plants without treatment	White spruce	Needles	total RNA	SYBR Green
SAMPLE 3	927_OP_Repetition_2	Control	Plants without treatment	White spruce	Needles	total RNA	SYBR Green
SAMPLE 4	129*756_CC_Repetition_1	Test	Plants without treatment	White spruce	Needles	total RNA	SYBR Green
SAMPLE 5	129_OP_Repetition_1	Control	Plants without treatment	White spruce	Needles	total RNA	SYBR Green
SAMPLE 6	754*966_CC_Repetition_1	Test	Plants without treatment	White spruce	Needles	total RNA	SYBR Green
SAMPLE 7	927_OP_Repetition_3	Control	Plants without treatment	White spruce	Needles	total RNA	SYBR Green
SAMPLE 8	129*756_CC_Repetition_2	Test	Plants without treatment	White spruce	Needles	total RNA	SYBR Green
SAMPLE 9	129_PM_Repetition_1	Test	Plants without treatment	White spruce	Needles	total RNA	SYBR Green
SAMPLE 10	138*752_CC_Repetition_1	Test	Plants without treatment	White spruce	Needles	total RNA	SYBR Green
SAMPLE 11	138_OP_Repetition_1	Control	Plants without treatment	White spruce	Needles	total RNA	SYBR Green
SAMPLE 12	193_PM_Repetition_1	Test	Plants without treatment	White spruce	Needles	total RNA	SYBR Green
SAMPLE 13	193_OP_Repetition_1	Control	Plants without treatment	White spruce	Needles	total RNA	SYBR Green
SAMPLE 14	122*1047_CC_Repetition_1	Test	Plants without treatment	White spruce	Needles	total RNA	SYBR Green
SAMPLE 15	122_PM_Repetition_1	Test	Plants without treatment	White spruce	Needles	total RNA	SYBR Green
SAMPLE 16	122_OP_Repetition_1	Control	Plants without treatment	White spruce	Needles	total RNA	SYBR Green
SAMPLE 17	754*966_CC_Repetition_2	Test	Plants without treatment	White spruce	Needles	total RNA	SYBR Green
SAMPLE 18	754_PM_Repetition_1	Test	Plants without treatment	White spruce	Needles	total RNA	SYBR Green
SAMPLE 19	754_OP_Repetition_1	Control	Plants without treatment	White spruce	Needles	total RNA	SYBR Green
SAMPLE 20	96_OP_Repetition_1	Control	Plants without treatment	White spruce	Needles	total RNA	SYBR Green
SAMPLE 21	927*991_CC_Repetition_1	Test	Plants without treatment	White spruce	Needles	total RNA	SYBR Green
SAMPLE 22	927_PM_Repetition_2	Test	Plants without treatment	White spruce	Needles	total RNA	SYBR Green
SAMPLE 23	927_OP_Repetition_4	Control	Plants without treatment	White spruce	Needles	total RNA	SYBR Green
SAMPLE 24	927_OP_Repetition_5	Control	Plants without treatment	White spruce	Needles	total RNA	SYBR Green
SAMPLE 25	129*756_CC_Repetition_3	Test	Plants without treatment	White spruce	Needles	total RNA	SYBR Green
SAMPLE 26	129_PM_Repetition_2	Test	Plants without treatment	White spruce	Needles	total RNA	SYBR Green
SAMPLE 27	129_OP_Repetition_2	Control	Plants without treatment	White spruce	Needles	total RNA	SYBR Green
SAMPLE 28	138*752_CC_Repetition_2	Test	Plants without treatment	White spruce	Needles	total RNA	SYBR Green
SAMPLE 29	138_PM_Repetition_1	Test	Plants without treatment	White spruce	Needles	total RNA	SYBR Green
SAMPLE 30	138_OP_Repetition_2	Control	Plants without treatment	White spruce	Needles	total RNA	SYBR Green
SAMPLE 31	193*1045_CC_Repetition_1	Test	Plants without treatment	White spruce	Needles	total RNA	SYBR Green
SAMPLE 32	193_PM_Repetition_2	Test	Plants without treatment	White spruce	Needles	total RNA	SYBR Green
SAMPLE 33	193_OP_Repetition_2	Control	Plants without treatment	White spruce	Needles	total RNA	SYBR Green
SAMPLE 34	122*1047_CC_Repetition_2	Test	Plants without treatment	White spruce	Needles	total RNA	SYBR Green
SAMPLE 35	122_PM_Repetition_2	Test	Plants without treatment	White spruce	Needles	total RNA	SYBR Green
SAMPLE 36	122_OP_Repetition_2	Control	Plants without treatment	White spruce	Needles	total RNA	SYBR Green
SAMPLE 37	754*966_CC_Repetition_3	Test	Plants without treatment	White spruce	Needles	total RNA	SYBR Green
SAMPLE 38	754_PM_Repetition_2	Test	Plants without treatment	White spruce	Needles	total RNA	SYBR Green
SAMPLE 39	754_OP_Repetition_2	Control	Plants without treatment	White spruce	Needles	total RNA	SYBR Green
SAMPLE 40	754_OP_Repetition_3	Control	Plants without treatment	White spruce	Needles	total RNA	SYBR Green
SAMPLE 41	754_PM_Repetition_4	Control	Plants without treatment	White spruce	Needles	total RNA	SYBR Green
SAMPLE 42	96_OP_Repetition_2	Control	Plants without treatment	White spruce	Needles	total RNA	SYBR Green
SAMPLE 43	154_OP_Repetition_1	Control	Plants without treatment	White spruce	Needles	total RNA	SYBR Green
SAMPLE 44	927_PM_Repetition_3	Test	Plants without treatment	White spruce	Needles	total RNA	SYBR Green
SAMPLE 45	129_OP_Repetition_3	Control	Plants without treatment	White spruce	Needles	total RNA	SYBR Green
SAMPLE 46	138_PM_Repetition_2	Test	Plants without treatment	White spruce	Needles	total RNA	SYBR Green
SAMPLE 47	138_OP_Repetition_3	Control	Plants without treatment	White spruce	Needles	total RNA	SYBR Green
SAMPLE 48	193*1045_CC_Repetition_2	Test	Plants without treatment	White spruce	Needles	total RNA	SYBR Green
SAMPLE 49	193_OP_Repetition_3	Control	Plants without treatment	White spruce	Needles	total RNA	SYBR Green
SAMPLE 50	122_OP_Repetition_3	Control	Plants without treatment	White spruce	Needles	total RNA	SYBR Green
SAMPLE 51	754_OP_Repetition_4	Control	Plants without treatment	White spruce	Needles	total RNA	SYBR Green
SAMPLE 52	138*752_CC_Repetition_3	Test	Plants without treatment	White spruce	Needles	total RNA	SYBR Green
SAMPLE 53	138_PM_Repetition_3	Test	Plants without treatment	White spruce	Needles	total RNA	SYBR Green
SAMPLE 54	122*1047_CC_Repetition_3	Test	Plants without treatment	White spruce	Needles	total RNA	SYBR Green
SAMPLE 55	122_PM_Repetition_3	Test	Plants without treatment	White spruce	Needles	total RNA	SYBR Green
SAMPLE 56	754_PM_Repetition_3	Test	Plants without treatment	White spruce	Needles	total RNA	SYBR Green
SAMPLE 57	754_OP_Repetition_5	Control	Plants without treatment	White spruce	Needles	total RNA	SYBR Green
SAMPLE 58	96_OP_Repetition_3	Control	Plants without treatment	White spruce	Needles	total RNA	SYBR Green
SAMPLE 59	154_OP_Repetition_2	Control	Plants without treatment	White spruce	Needles	total RNA	SYBR Green
SAMPLE 60	927*991_CC_Repetition_2	Test	Plants without treatment	White spruce	Needles	total RNA	SYBR Green
SAMPLE 61	927_OP_Repetition_6	Control	Plants without treatment	White spruce	Needles	total RNA	SYBR Green
SAMPLE 62	129_PM_Repetition_3	Test	Plants without treatment	White spruce	Needles	total RNA	SYBR Green
SAMPLE 63	754_OP_Repetition_6	Control	Plants without treatment	White spruce	Needles	total RNA	SYBR Green
SAMPLE 64	754_PM_Repetition_5	Control	Plants without treatment	White spruce	Needles	total RNA	SYBR Green
SAMPLE 65	154_OP_Repetition_3	Control	Plants without treatment	White spruce	Needles	total RNA	SYBR Green
SAMPLE 66	193*1045_CC_Repetition_3	Test	Plants without treatment	White spruce	Needles	total RNA	SYBR Green
SAMPLE 67	927*991_CC_Repetition_3	Test	Plants without treatment	White spruce	Needles	total RNA	SYBR Green
SAMPLE 68	193_PM_Repetition_3	Test	Plants without treatment	White spruce	Needles	total RNA	SYBR Green
SAMPLE 69	754_PM_Repetition_6	Control	Plants without treatment	White spruce	Needles	total RNA	SYBR Green
PROTOCOLS
growth protocol	On January 20, 2020 seedlings were removed from cold storage and planted into 2L pots filled with Sunshine Mix #4 (Sungro, Vilna, Alberta, Canada) and grown at the Biological Sciences greenhouse, University of Alberta, for their second growing season, between January 28 and April 28, 2020 (Day 92 of the experiment). Plants were grown under natural light supplemented by cool-white fluorescent lamp…
treatment protocol	No treatment were applied to the seedlings.
extract protocol	Using 0.5 g of ground apical internode, total RNA was extracted using the ‘Purelink RNA Mini Kit’, ‘Plant RNA Isolation Aid’ and ‘PureLink DNAse’ (Thermo Scientific Inc, Waltham, USA), following the manufacturer’s instructions The cDNA synthesis was performed using a total of 0.5 μg RNA from each sample, with the Superscript III reverse transcriptase (Thermo Scientific Inc, Waltham, USA). The PgG…
label protocol	PCR reactions were performed in 10 mL, containing SYBR Green master mix [0.2 mM dNTPs, 0.3 U Platinum Taq Polymerase (Invitrogen, Waltham, USA), 0.25X SYBR Green, and 0.1X ROX], 50 ng of cDNA and 300 nM of each primer. Three technical replicates for each reaction were analyzed on an ABI PRISM 7900HT Sequence Detection System (Applied Biosystems, Waltham, USA) where the first step was 95°C for 2 m…
hyb protocol	n/a
scan protocol	n/a
data processing	The normalization and all the data analysis were performed according to the manufacturers instructions. For the normalization it uses the average of the TIF housekeeping gene. The three technical replicates ( PgGA2ox1, PgGA3ox1, PgGA20ox1) and two technical replicates (PgDELLA1 and PgGID1) were averaged for each sample, for the subsequent analysis. Target gene signals normalized to housekeeping g…
value definition	Matrix normalized worksheet reports normalized signal (against TIF housekeeping gene).
PLATFORM
title	ABI PRISM 7900HT Sequence Detection System (Applied Biosystems, Waltham, USA)
technology	RT-PCR
distribution	virtual
organism	White spruce
manufacturer	Applied Biosystems
manufacture protocol	see manufacturer's website
catalog number	ABI PRISM 7900HT
description	RT-PCR assay
# Platform Column Definitions: describe the contents of each platform column in the Matrix normalized Template
Accession number (NCBI)	Accession ID for each gene to be found on the NCBI
Description	Gene description
Gene Name	Gene name

## Sheet: Matrix non-normalized
Matrix with non-normalized data (raw Ct values)
ID_REF	Gene name	Technical replicate	SAMPLE 1	SAMPLE 2	SAMPLE 3	SAMPLE 4	SAMPLE 5	SAMPLE 6	SAMPLE 7	SAMPLE 8	SAMPLE 9	SAMPLE 10	SAMPLE 11	SAMPLE 12	SAMPLE 13	SAMPLE 14	SAMPLE 15	SAMPLE 16	SAMPLE 17	SAMPLE 18	SAMPLE 19	SAMPLE 20	SAMPLE 21	SAMPLE 22	SAMPLE 23	SAMPLE 24	SAMPLE 25	SAMPLE 26	SAMPLE 27	SAMPLE 28	SAMPLE 29	SAMPLE 30	SAMPLE 31	SAMPLE 32	SAMPLE 33	SAMPLE 34	SAMPLE 35	SAMPLE 36	SAMPLE 37	SAMPLE 38	SAMPLE 39	SAMPLE 40	SAMPLE 41	SAMPLE 42	SAMPLE 43	SAMPLE 44	SAMPLE 45	SAMPLE 46	SAMPLE 47
A01	GA2ox	Rep1	29.3252	28.9121	30.004	28.6465	28.5122	30.1178	32.1581	29.2594	29.9684	29.8217	28.8073	29.0423	29.1885	30.2635	29.3702	29.8837	29.9138	28.1417	27.9737	29.3633	28.9251	29.6646	29.0538	29.5075	29.9724	28.3801	29.8607	30.9194	31.4843	29.8247	29.8803	29.7342	29.914	30.0502	28.6199	28.8792	30.1294	29.055	28.9032	28.2158	29.9264	29.4099	30.0412	29.9917	29.7327	29.0068	29.6498
A02	GA2ox	Rep2	29.4679	28.8697	29.9853	28.5323	28.6503	29.8415	32.2228	29.5665	30.1604	29.7981	28.546	28.7321	29.8103	29.9364	28.9591	30.4499	29.7916	28.3005	28.4885	29.3757	28.7631	29.3587	29.1854	29.7959	29.9596	28.6048	29.803	31.2648	31.7441	29.8696	29.9193	29.8965	29.7479	29.0681	28.6203	28.9489	29.9472	28.9734	28.8126	27.9816	29.7449	29.3246	29.8578	30.0785	29.6033	29.0189	29.4688
A03	GA2ox	Rep3	29.2847	28.9948	29.9561	28.5062	28.8152	30.159	31.7927	28.9134	30.0644	29.8783	28.3248	28.9496	28.9697	29.8474	28.9196	29.8625	29.636	28.411	29.9302	29.3695	29.1414	29.4558	28.976	29.4484	29.8844	28.4925	29.7509	30.6209	31.6142	29.4927	30.6371	29.5943	30.0593	29.512	28.5107	28.8855	29.9033	29.1184	28.8617	27.9236	29.7117	29.5699	29.9787	30.0612	29.7917	29.0129	29.6456
A04	GA3ox	Rep1	28.9419	29.5982	33.0018	30.4755	30.7208	29.5797	29.9647	30.4945	30.4523	29.9406	29.7299	27.8779	31.0125	32.3084	28.8223	32.7321	30.5392	30.6422	30.0602	31.2899	28.3816	31.2784	31.7139	29.2485	32.3692	31.2502	30.9301	30.8484	32.8823	31.1467	29.7894	31.7744	31.7048	28.5648	31.4836	31.1128	31.9335	29.8094	33.8333	33.3292	29.8329	30.3555	33.0341	31.8961	32.0268	30.0115	31.2027
A05	GA3ox	Rep2	29.3453	29.4571	32.5118	30.9341	30.7654	29.5746	29.8866	30.4871	30.1938	29.9253	30.0521	27.9722	30.9459	31.7856	28.7713	31.9296	31.1629	30.0522	29.9575	30.942	28.3622	31.7294	31.9353	29.2634	32.7642	31.2677	31.9257	31.0175	32.8068	30.9364	29.9236	32.2336	32.181	28.4431	30.8063	31.5908	31.614	29.5367	33.4182	32.9632	30.3235	30.3525	32.9244	31.7578	31.9656	30.0887	30.8066
A06	GA3ox	Rep3	29.2459	29.7908	32.7568	30.7048	30.7915	29.2947	30.2147	30.9666	30.3333	29.933	29.891	28.1773	30.6729	32.1133	28.6409	32.4358	30.8593	30.3005	28.8395	31.1159	28.2543	31.3981	31.9296	28.9525	32.5544	31.259	31.3143	30.8964	32.5823	31.4957	29.8039	31.7371	32.2306	28.4263	31.589	31.6448	31.3877	29.8476	34.6322	31.8155	29.8992	30.5313	32.9792	31.7386	31.9962	30.0501	30.9887
A07	GA20ox	Rep1	28.9163	28.9068	27.7342	28.621	29.4562	29.511	29.9211	27.7207	27.9645	27.3153	27.9391	27.7956	28.5538	28.8336	28.0008	28.1574	28.5083	29.9034	28.9109	29.2914	28.544	29.0523	27.9445	27.9622	30.4369	28.1539	30.1397	28.7858	30.6051	29.4257	28.9138	29.9248	30.2847	29.421	28.1259	29.5402	30.4851	28.6264	28.977	29.4419	29.4052	30.1602	29.5391	29.6847	29.7857	29.6294	29.5074
A08	GA20ox	Rep2	29.2072	28.9204	27.3456	28.4207	29.3006	29.5233	29.7489	27.8613	27.9688	27.4087	28.0212	27.5916	28.4684	29.0748	27.9961	27.9895	28.9048	29.6296	28.8826	29.8386	28.0648	28.6931	28.0054	27.9358	29.9479	28.5772	30.0562	28.9673	31.6562	29.1736	27.6914	30.2829	30.1428	29.5207	28.1968	29.05	31.0481	28.8044	28.9741	29.6895	29.3249	29.8662	29.5054	29.8544	29.7926	29.934	29.2751
A09	GA20ox	Rep3	28.5773	28.9136	27.6614	28.3622	29.3079	29.6647	30.0906	27.9277	28.2131	27.7243	27.9801	27.6936	28.3877	29.0022	28.1432	28.1791	28.6799	29.851	20.281	29.565	28.102	28.8727	27.7606	27.9557	30.4425	28.2906	29.984	28.8016	31.1307	29.2889	28.3026	30.1038	30.2925	29.5083	28.254	29.0569	30.9258	28.718	29.3677	29.9547	29.2027	30.0659	29.8152	29.9408	29.7582	29.5832	29.5114
A10	TIF (control gene)	Rep1	19.9634	19.9704	19.4287	20.2827	20.2338	20.1981	21.7142	19.8504	20.549	20.0256	19.9194	18.8808	20.2534	20.2136	20.2988	20.6238	20.4795	20.4649	20.3246	20.3951	20.3689	20.938	20.5266	20.4097	21.7666	19.6623	21.1256	20.8752	22.7616	20.9616	20.4638	20.7827	20.8672	20.4391	20.8668	20.9689	21.8261	20.8513	20.9258	20.7497	21.6828	21.5939	21.9388	21.7249	21.5454	21.2201	21.1303
A11	TIF (control gene)	Rep2	19.9049	19.9305	19.7436	20.2297	20.1304	20.2492	21.7629	19.8328	20.4335	19.8202	20.0109	18.9628	20.2502	20.2435	19.8004	20.5484	20.4352	20.4259	20.2195	20.4503	20.4413	21.0998	20.611	20.56	21.7333	19.6379	21.2571	20.9912	22.7339	20.8841	20.5272	20.5762	21.0475	20.4952	20.5393	20.9588	21.4252	20.3298	20.9863	20.6919	21.7206	21.6328	21.9966	21.3886	21.4826	21.3224	20.9273
A12	TIF (control gene)	Rep3	19.9096	19.7903	19.8355	20.3511	20.1821	20.2447	21.7096	19.8525	20.4913	19.8406	20.0693	19.015	20.2832	20.2974	19.9424	20.5861	20.6332	20.4454	20.272	20.4227	20.4051	21.0057	20.6348	20.5675	21.75	19.6501	21.079	20.9332	22.7478	20.934	20.4955	20.6951	20.9574	20.4672	20.5154	20.9297	21.6257	20.9548	21.0278	20.7208	21.7159	21.6131	22.004	21.5567	21.401	21.2713	20.8466
B01	DELLA	Rep1	25.9502	25.876	25.1223	26.3022	26.4296	25.6965	26.9725	25.7801	26.938	25.7515	25.9109	24.8305	25.9522	26.2066	26.0037	25.8892	26.644	25.9306	26.7008	26.3632	26.2982	27.1856	26.9813	26.7662	26.2085	25.886	25.6698	25.2677	26.6644	26.017	25.6251	26.5177	26.889	26.2303	25.9423	27.2137	27.8314	27.0316	26.8892	26.3888	27.7632	27.8982	27.7068	26.9917	27.9722	27.3675	26.8126
B02	DELLA	Rep2	26.0784	25.713	25.0778	26.4414	26.2775	25.7765	26.5232	25.703	26.1361	25.7594	25.9707	24.8533	25.9282	26.1291	26.1788	25.8877	26.5139	25.9254	26.3363	26.4328	26.3702	27.6083	27.026	26.7959	26.0932	26.2637	25.6914	25.3697	26.8477	26.5113	26.2559	26.3644	26.9076	26.2494	25.8346	27.6243	27.3031	24.6346	26.8589	26.0993	27.3916	27.531	27.9256	26.9181	27.967	27.1734	26.6314
B03	GID	Rep1	28.6097	27.9462	27.5676	28.7152	28.8174	27.9951	29.616	27.5922	28.3933	28.3515	28.3146	27.504	28.2247	29.2107	28.1814	28.3162	28.6633	28.3135	28.7492	28.1104	28.4111	30.0916	29.0588	29.449	28.6566	27.9334	27.7434	27.4645	28.5562	28.0517	28.0087	27.7306	29.0947	28.6497	28.473	29.4802	29.9755	29.8414	28.9927	28.6745	30.1559	29.7693	30.0454	29.1014	30.6283	29.0608	28.5504
B04	GID	Rep2	28.9277	27.9411	27.4346	28.6343	28.7935	27.8848	29.292	27.734	28.9529	28.1403	27.9161	27.3014	28.056	28.9503	28.4081	28.2804	28.3743	28.0995	28.4849	28.5054	28.8643	30.2132	28.8237	29.3318	28.7572	28.0026	27.8766	27.5742	28.4746	28.2225	28.0783	28.0711	28.5705	28.9437	28.2334	29.6874	30.0423	29.3336	29.276	27.1322	30.2611	29.8217	29.6393	29.4207	30.4356	29.0053	29.199
B05	TIF (control gene)	Rep1	20.5095	20.4897	20.2078	20.9488	20.8477	20.232	21.6687	20.3314	20.8494	20.4133	20.6965	19.3946	20.8321	20.9108	20.5922	21.0529	20.7336	20.3611	20.8294	20.9627	20.8053	21.5446	20.8165	20.8024	20.8513	19.8385	20.7061	19.9329	21.033	20.9757	19.84	19.7962	21.2031	20.8286	20.9594	21.6717	22.1312	21.5861	21.8763	21.4002	22.3874	22.2817	22.4693	22.0465	22.5922	21.5644	21.9244
B06	TIF (control gene)	Rep2	20.4774	20.2873	20.4195	20.9611	20.9443	20.7237	21.6167	20.2623	20.9338	20.4344	20.7104	19.5988	20.7897	20.9352	20.6842	21.532	20.6384	20.6847	21.1514	21.94	20.7386	21.6125	20.8624	20.8032	20.7043	19.4786	20.6895	20.0647	21.0341	20.4219	19.9414	19.9317	21.2468	20.8523	20.9046	21.5477	22.4318	21.9013	22.0778	21.1823	22.4916	22.2834	22.5268	22.1509	22.3762	21.7084	21.3994
[truncated: 22 more columns]

## Sheet: Matrix normalized
# truncated example of Matrix with PCR assay annotation columns and normalized target gene signal data
ID_REF	Accession number (NCBI)	Description	Gene Name	SAMPLE 1	SAMPLE 2	SAMPLE 3	SAMPLE 4	SAMPLE 5	SAMPLE 6	SAMPLE 7	SAMPLE 8	SAMPLE 9	SAMPLE 10	SAMPLE 11	SAMPLE 12	SAMPLE 13	SAMPLE 14	SAMPLE 15	SAMPLE 16	SAMPLE 17	SAMPLE 18	SAMPLE 19	SAMPLE 20	SAMPLE 21	SAMPLE 22	SAMPLE 23	SAMPLE 24	SAMPLE 25	SAMPLE 26	SAMPLE 27	SAMPLE 28	SAMPLE 29	SAMPLE 30	SAMPLE 31	SAMPLE 32	SAMPLE 33	SAMPLE 34	SAMPLE 35	SAMPLE 36	SAMPLE 37	SAMPLE 38	SAMPLE 39	SAMPLE 40	SAMPLE 41	SAMPLE 42	SAMPLE 43	SAMPLE 44	SAMPLE 45	SAMPLE 46
A01	PG29_BFMXY_Trinity_Pasafly_comp427203_c0_seq1	Gibberellin 2-oxidase	GA2ox	9.43328	9.02846	10.3125	8.27383	8.47712	9.80879	10.329	9.40118	9.57309	9.93725	8.55951	9.95513	9.06058	9.76427	9.06909	9.47929	9.26449	7.83903	7.95611	8.94678	8.5381	8.47855	8.48094	9.07153	8.18881	8.84237	8.65093	10.0019	8.86643	8.80238	9.65011	9.05703	8.94969	9.07624	7.94308	7.95205	8.36762	8.33698	7.87917	7.3195	8.0879	7.82152	7.97945	8.48706	8.23289	7.74162
A02	PG29_BFMXY_Trinity_Pasafly_comp413321_c0_seq1_rc	Gibberellin 3-oxidase	GA3ox	9.25174	9.71828	13.0875	10.417	10.5771	9.25236	8.29311	10.8041	9.83519	10.0375	9.89115	9.05627	10.6149	11.8176	8.73094	11.7797	10.3378	9.8863	9.70765	10.6932	7.92762	10.4542	11.2688	8.64239	10.8126	11.6089	10.2361	9.9876	10.0094	10.2663	9.34351	11.2303	11.0814	8.01088	10.6525	10.497	10.0194	9.01927	12.9813	11.9818	8.31211	8.79983	10.9994	10.2408	10.5199	8.7788
A03	HQ408573.1	Gibberellin 20-oxidase	GA20ox	8.97432	9.01655	7.91113	8.18012	9.1728	9.33567	8.19128	7.9913	7.55751	7.58732	7.98026	8.74071	8.20771	8.71872	8.03284	7.52253	8.18174	9.34928	8.60267	9.1423	7.83184	7.85822	7.31267	7.43885	8.52577	8.69048	8.90606	7.91838	8.3829	8.3695	7.80711	9.41918	9.28263	9.01612	7.55169	8.26322	9.19396	8.0043	8.12629	8.97453	7.60448	8.41749	7.64011	8.26988	8.30248	8.44427
A04	BN001188.1	DELLA gene	DELLA	5.52089	5.40602	4.78641	5.41685	5.45757	5.25859	5.10515	5.44468	5.64544	5.3316	5.23736	5.34521	5.12934	5.24482	5.453	4.59599	5.89296	5.40508	5.5282	4.94664	5.56222	5.8184	6.1642	5.97825	5.37302	6.4163	4.98283	5.31991	5.72251	5.56531	6.0498	6.57706	5.67334	5.39941	4.95644	5.80925	5.28574	4.08941	4.89701	4.95282	5.13786	5.43206	5.31808	4.85621	5.48538	5.63403
A05	BT102965.1	GID gene	GID	8.27526	7.55515	7.1874	7.71977	7.90946	7.46207	7.81129	7.36624	7.78149	7.82204	7.41192	7.90605	7.32948	8.15744	7.6565	7.00588	7.83275	7.68354	7.62668	6.85653	7.86572	8.57382	8.10179	8.58761	7.92911	8.30944	7.11223	7.52056	7.48184	7.4383	8.15277	8.03688	7.60759	7.95626	7.42121	7.97407	7.72741	7.84379	7.15731	6.61209	7.76897	7.51298	7.34427	7.16236	8.04775	7.39663
[truncated: 23 more columns]
